# Supplementary material
Source: ML conference proceedings conference paper supplement (https://openreview.net/forum?id=8RExG-EKC22)
Supplement: supplementary_material [file attachment]

## A PROOFS

**Lemma 1.** *Let  $X$  be a non-negative random variable and  $\Phi$  be a continuous function on  $[0, \infty)$ . If  $\Phi'$  is integrable on all closed intervals in  $[0, \infty)$ ,*

$$\mathbb{E}[\Phi(X)] = \Phi(0) + \int_0^\infty \Phi'(t) \Pr(X \geq t) dt$$

*Proof.*

$$\begin{aligned} \Phi(0) + \int_0^\infty \Phi'(t) \Pr(X \geq t) dt &= \Phi(0) + \int_0^\infty \int_t^\infty \Phi'(t) p(x) dx dt \\ &= \Phi(0) + \int_{\{x \geq t, t \geq 0\}} \Phi'(t) p(x) d \begin{pmatrix} x \\ t \end{pmatrix} \\ &= \Phi(0) + \int_{\{t \leq x, t \geq 0\}} \Phi'(t) p(x) d \begin{pmatrix} x \\ t \end{pmatrix} \\ &= \Phi(0) + \int_0^\infty \int_0^x \Phi'(t) p(x) dt dx \\ &= \Phi(0) + \int_0^\infty \left( \int_0^x \Phi'(t) dt \right) p(x) dx \\ &= \Phi(0) + \int_0^\infty (\Phi(x) - \Phi(0)) p(x) dx \quad (2\text{nd FTC}) \\ &= \Phi(0) + \int_0^\infty \Phi(x) p(x) dx - \int_0^\infty \Phi(0) p(x) dx \\ &= \Phi(0) + \int_0^\infty \Phi(x) p(x) dx - \Phi(0) \int_0^\infty p(x) dx \\ &= \Phi(0) + \mathbb{E}[\Phi(X)] - \Phi(0) \\ &= \mathbb{E}[\Phi(X)] \end{aligned}$$

□

**Lemma 2.** *Under the choice of  $\Phi_\tau(\cdot)$  above and its associated  $\Phi'_\tau(\cdot)$ ,*

$$\mathbb{E}_{z_1, \dots, z_m \sim \mathcal{N}(0, I)} [\Phi_{\tau_i}(d(\mathbf{x}_i, T_\theta(\mathbf{z}_j)))] = \tau_i - \int_{\delta\tau_i}^{\tau_i} \Pr(d(\mathbf{x}_i, T_\theta(\mathbf{z}_j)) < t) dt.$$

*Proof.* By definition,  $\Phi_{\tau_i}(0) = \delta\tau_i$ .

$$\begin{aligned} \mathbb{E}_{z_1, \dots, z_m \sim \mathcal{N}(0, I)} [\Phi_{\tau_i}(d(\mathbf{x}_i, T_\theta(\mathbf{z}_j)))] &= \Phi_{\tau_i}(0) + \int_0^\infty \Phi'_{\tau_i}(t) \Pr(d(\mathbf{x}_i, T_\theta(\mathbf{z}_j)) \geq t) dt \quad (\text{Lemma 1}) \\ &= \delta\tau_i + \int_{\delta\tau_i}^{\tau_i} \Pr(d(\mathbf{x}_i, T_\theta(\mathbf{z}_j)) \geq t) dt \\ &= \delta\tau_i + \int_{\delta\tau_i}^{\tau_i} (1 - \Pr(d(\mathbf{x}_i, T_\theta(\mathbf{z}_j)) < t)) dt \\ &= \delta\tau_i + (\tau_i - \delta\tau_i) - \int_{\delta\tau_i}^{\tau_i} \Pr(d(\mathbf{x}_i, T_\theta(\mathbf{z}_j)) < t) dt \\ &= \tau_i - \int_{\delta\tau_i}^{\tau_i} \Pr(d(\mathbf{x}_i, T_\theta(\mathbf{z}_j)) < t) dt \end{aligned}$$

□

**Lemma 3.** Under the choice of  $\Phi_\tau(\cdot)$  above and its associated  $\Phi'_\tau(\cdot)$ ,

$$\mathcal{L}_{\{\tau_i\}_i}(\theta) = \frac{1}{n} \sum_{i=1}^n \frac{1}{mw_i} \sum_{j=1}^m \int_{\delta\tau_i}^{\tau_i} \Pr(d(\mathbf{x}_i, T_\theta(\mathbf{z}_j)) < t) dt.$$

*Proof.*

$$\begin{aligned} \mathcal{L}_{\{\tau_i\}_i}(\theta) &= \mathbb{E}_{z_1, \dots, z_m \sim \mathcal{N}(0, I)} \left[ \frac{1}{n} \sum_{i=1}^n \frac{1}{w_i} \left( \tau_i - \frac{1}{m} \sum_{j=1}^m \Phi_{\tau_i}(d(\tilde{\mathbf{x}}_j, \mathbf{x}_i)) \right) \right] \\ &= \frac{1}{n} \sum_{i=1}^n \frac{1}{w_i} \left( \tau_i - \frac{1}{m} \sum_{j=1}^m \mathbb{E}_{z_1, \dots, z_m \sim \mathcal{N}(0, I)} [\Phi_{\tau_i}(d(\tilde{\mathbf{x}}_j, \mathbf{x}_i))] \right) \\ &= \frac{1}{n} \sum_{i=1}^n \frac{1}{w_i} \left( \tau_i - \frac{1}{m} \sum_{j=1}^m \left( \tau_i - \int_{\delta\tau_i}^{\tau_i} \Pr(d(\tilde{\mathbf{x}}_j, \mathbf{x}_i) < t) dt \right) \right) \quad (\text{Lemma 2}) \\ &= \frac{1}{n} \sum_{i=1}^n \frac{1}{mw_i} \sum_{j=1}^m \int_{\delta\tau_i}^{\tau_i} \Pr(d(\tilde{\mathbf{x}}_j, \mathbf{x}_i) < t) dt \end{aligned}$$

□

**Equation 3.**

*Proof.*

$$\begin{aligned} \mathcal{L}_{\{\tau_i\}_i}(\theta) &= \mathbb{E}_{z_1, \dots, z_m \sim \mathcal{N}(0, I)} \left[ \frac{1}{n} \sum_{i=1}^n \frac{1}{w_i} \left( \tau_i - \frac{m-1}{m} \tau_i - \frac{1}{m} \max(\min_{j \in [m]} d(\mathbf{x}_i, T_\theta(\mathbf{z}_j)), \delta\tau_i) \right) \right] \\ &= \mathbb{E}_{z_1, \dots, z_m \sim \mathcal{N}(0, I)} \left[ \frac{1}{n} \sum_{i=1}^n \frac{1}{w_i} \left( \frac{1}{m} \tau_i - \frac{1}{m} \max(\min_{j \in [m]} d(\mathbf{x}_i, T_\theta(\mathbf{z}_j)), \delta\tau_i) \right) \right] \\ &= \mathbb{E}_{z_1, \dots, z_m \sim \mathcal{N}(0, I)} \left[ \frac{1}{nm} \sum_{i=1}^n \frac{1}{w_i} \left( \tau_i - \max(\min_{j \in [m]} d(\mathbf{x}_i, T_\theta(\mathbf{z}_j)), \delta\tau_i) \right) \right] \end{aligned}$$

□

**Equation 4.**

*Proof.*

$$\begin{aligned} \arg \max_{\theta} \mathcal{L}_{\{\tau_i\}_i}(\theta) &= \arg \max_{\theta} \mathbb{E}_{z_1, \dots, z_m \sim \mathcal{N}(0, I)} \left[ \frac{1}{nm} \sum_{i=1}^n \frac{1}{w_i} \left( \tau_i - \max(\min_{j \in [m]} d(\mathbf{x}_i, T_\theta(\mathbf{z}_j)), \delta\tau_i) \right) \right] \\ &= \arg \max_{\theta} \mathbb{E}_{z_1, \dots, z_m \sim \mathcal{N}(0, I)} \left[ \sum_{i=1}^n \frac{1}{w_i} \left( \tau_i - \max(\min_{j \in [m]} d(\mathbf{x}_i, T_\theta(\mathbf{z}_j)), \delta\tau_i) \right) \right] \\ &= \arg \max_{\theta} \mathbb{E}_{z_1, \dots, z_m \sim \mathcal{N}(0, I)} \left[ \sum_{i=1}^n \frac{\tau_i}{w_i} - \sum_{i=1}^n \frac{1}{w_i} \max(\min_{j \in [m]} d(\mathbf{x}_i, T_\theta(\mathbf{z}_j)), \delta\tau_i) \right] \\ &= \arg \max_{\theta} \mathbb{E}_{z_1, \dots, z_m \sim \mathcal{N}(0, I)} \left[ - \sum_{i=1}^n \frac{1}{w_i} \max(\min_{j \in [m]} d(\mathbf{x}_i, T_\theta(\mathbf{z}_j)), \delta\tau_i) \right] \\ &= \arg \min_{\theta} \mathbb{E}_{z_1, \dots, z_m \sim \mathcal{N}(0, I)} \left[ \sum_{i=1}^n \frac{1}{w_i} \max(\min_{j \in [m]} d(\mathbf{x}_i, T_\theta(\mathbf{z}_j)), \delta\tau_i) \right] \end{aligned}$$

□



**Lemma 4.** Under the choice of  $w_i = \int_{\delta\tau_i}^{\tau_i} \text{vol}(B_t(\mathbf{x}_i))dt := \int_{\delta\tau_i}^{\tau_i} \int_{B_t(\mathbf{x}_i)} d\mathbf{x}dt$ , where  $B_r(\mathbf{x}) = \{\mathbf{y} | d(\mathbf{y}, \mathbf{x}) < r\}$  is an open ball of radius  $r$  centred at  $\mathbf{x}$ ,

$$\lim_{\{\tau_i \rightarrow 0^+\}_i} \mathcal{L}_{\{\tau_i\}_i}(\theta) = \frac{1}{n} \sum_{i=1}^n p_\theta(\mathbf{x}_i)$$

*Proof.*

$$\begin{aligned} \mathcal{L}_{\{\tau_i\}_i}(\theta) &= \frac{1}{n} \sum_{i=1}^n \frac{1}{mw_i} \sum_{j=1}^m \int_{\delta\tau_i}^{\tau_i} \Pr(d(\tilde{\mathbf{x}}_j, \mathbf{x}_i) < t) dt \quad (\text{Lemma 3}) \\ &= \frac{1}{n} \sum_{i=1}^n \frac{1}{mw_i} \sum_{j=1}^m \int_{\delta\tau_i}^{\tau_i} \int_{B_t(\mathbf{x}_i)} p_\theta(\mathbf{x}) d\mathbf{x}dt \\ &= \frac{1}{nm} \sum_{i=1}^n \sum_{j=1}^m \frac{1}{w_i} \int_{\delta\tau_i}^{\tau_i} \int_{B_t(\mathbf{x}_i)} p_\theta(\mathbf{x}) d\mathbf{x}dt \\ &= \frac{1}{nm} \sum_{i=1}^n \sum_{j=1}^m \frac{\int_{\delta\tau_i}^{\tau_i} \int_{B_t(\mathbf{x}_i)} p_\theta(\mathbf{x}) d\mathbf{x}dt}{\int_{\delta\tau_i}^{\tau_i} \int_{B_t(\mathbf{x}_i)} d\mathbf{x}dt} \\ \lim_{\{\tau_i \rightarrow 0^+\}_i} \mathcal{L}_{\{\tau_i\}_i}(\theta) &= \frac{1}{nm} \sum_{i=1}^n \left( \lim_{\tau_i \rightarrow 0^+} \left( \sum_{j=1}^m \frac{\int_{\delta\tau_i}^{\tau_i} \int_{B_t(\mathbf{x}_i)} p_\theta(\mathbf{x}) d\mathbf{x}dt}{\int_{\delta\tau_i}^{\tau_i} \int_{B_t(\mathbf{x}_i)} d\mathbf{x}dt} \right) \right) \\ &= \frac{1}{nm} \sum_{i=1}^n \sum_{j=1}^m \left( \lim_{\tau_i \rightarrow 0^+} \frac{\int_{\delta\tau_i}^{\tau_i} \int_{B_t(\mathbf{x}_i)} p_\theta(\mathbf{x}) d\mathbf{x}dt}{\int_{\delta\tau_i}^{\tau_i} \int_{B_t(\mathbf{x}_i)} d\mathbf{x}dt} \right) \\ &= \frac{1}{nm} \sum_{i=1}^n \sum_{j=1}^m \left( \lim_{\tau_i \rightarrow 0^+} \frac{\int_{B_{\tau_i}(\mathbf{x}_i)} p_\theta(\mathbf{x}) d\mathbf{x} - \delta \int_{B_{\delta\tau_i}(\mathbf{x}_i)} p_\theta(\mathbf{x}) d\mathbf{x}}{\int_{B_{\tau_i}(\mathbf{x}_i)} d\mathbf{x} - \delta \int_{B_{\delta\tau_i}(\mathbf{x}_i)} d\mathbf{x}} \right) \quad (\text{L'Hôpital and 2nd FTC}) \\ &= \frac{1}{nm} \sum_{i=1}^n \sum_{j=1}^m \left( \lim_{\tau_i \rightarrow 0^+} \frac{\int_{B_{\tau_i}(\mathbf{x}_i)} p_\theta(\mathbf{x}) (1 - \delta \mathbf{1}_{B_{\delta\tau_i}(\mathbf{x}_i)}(\mathbf{x})) d\mathbf{x}}{\int_{B_{\tau_i}(\mathbf{x}_i)} 1 - \delta \mathbf{1}_{B_{\delta\tau_i}(\mathbf{x}_i)}(\mathbf{x}) d\mathbf{x}} \right) \\ &= \frac{1}{nm} \sum_{i=1}^n \sum_{j=1}^m \left( \lim_{\tau_i \rightarrow 0^+} \frac{\int_0^{\tau_i} (1 - \delta \mathbf{1}_{\{r < \delta\tau_i\}}(r)) \int_{\{\mathbf{x} | d(\mathbf{x}, \mathbf{x}_i) = r\}} p_\theta(\mathbf{x}) d\mathbf{x} dr}{\int_0^{\tau_i} (1 - \delta \mathbf{1}_{\{r < \delta\tau_i\}}(r)) \int_{\{\mathbf{x} | d(\mathbf{x}, \mathbf{x}_i) = r\}} d\mathbf{x} dr} \right) \\ &= \frac{1}{nm} \sum_{i=1}^n \sum_{j=1}^m \left( \lim_{\tau_i \rightarrow 0^+} \frac{\int_{\{\mathbf{x} | d(\mathbf{x}, \mathbf{x}_i) = \tau_i\}} p_\theta(\mathbf{x}) d\mathbf{x}}{\int_{\{\mathbf{x} | d(\mathbf{x}, \mathbf{x}_i) = \tau_i\}} d\mathbf{x}} \right) \quad (\text{L'Hôpital and 2nd FTC}) \\ &= \frac{1}{nm} \sum_{i=1}^n \sum_{j=1}^m p_\theta(\mathbf{x}_i) \\ &= \frac{1}{n} \sum_{i=1}^n p_\theta(\mathbf{x}_i) \end{aligned}$$

□

Note that under common metrics like  $\ell_p$  distances,  $w_i$  can be found in closed form, i.e.,  $\text{vol}(B_t(\mathbf{x}_i)) = (2t)^d \frac{\Gamma(1+1/p)^d}{\Gamma(1+d/p)}$ , and so  $w_i = \int_{\delta\tau_i}^{\tau_i} \text{vol}(B_t(\mathbf{x}_i))dt = \int_{\delta\tau_i}^{\tau_i} (2t)^d \frac{\Gamma(1+1/p)^d}{\Gamma(1+d/p)} dt = \frac{(2(1-\delta)\tau_i)^{d+1}}{2(d+1)} \cdot \frac{\Gamma(1+1/p)^d}{\Gamma(1+d/p)}$ , where  $\Gamma(\cdot)$  denotes the gamma function.

## B PSEUDO CODE FOR IMLE

---

### Algorithm 2 Implicit maximum likelihood estimation (IMLE) procedure

---

**Require:** The set of inputs  $\{\mathbf{x}_i\}_{i=1}^n$

- 1: Initialize the parameters  $\theta$  of the generator  $T_\theta$
- 2: **for**  $k = 1$  **to**  $K$  **do**
- 3:   Pick a random batch  $S \subseteq [n]$
- 4:   Draw latent codes  $Z \leftarrow \mathbf{z}_1, \dots, \mathbf{z}_m$  from  $\mathcal{N}(0, \mathbf{I})$
- 5:    $\sigma(i) \leftarrow \arg \min_{j \in [m]} d(\mathbf{x}_i, T_\theta(\mathbf{z}_j)) \forall i \in S$
- 6:   **for**  $l = 1$  **to**  $L$  **do**
- 7:     Pick a random mini batch  $\tilde{S} \subseteq S$
- 8:      $\theta \leftarrow \theta - \eta \nabla_\theta \left( \sum_{i \in \tilde{S}} d(\mathbf{x}_i, T_\theta(\mathbf{z}_{\sigma(i)})) \right) / |\tilde{S}|$
- 9:   **end for**
- 10: **end for**
- 11: **return**  $\theta$

---

## C ADDITIONAL RESULTS

We show more interpolation results for Adaptive IMLE on FFHQ subset and Obama in Fig. 5. We also show randomly generated samples for FFHQ subset and Obama in Fig. 7 and 6.

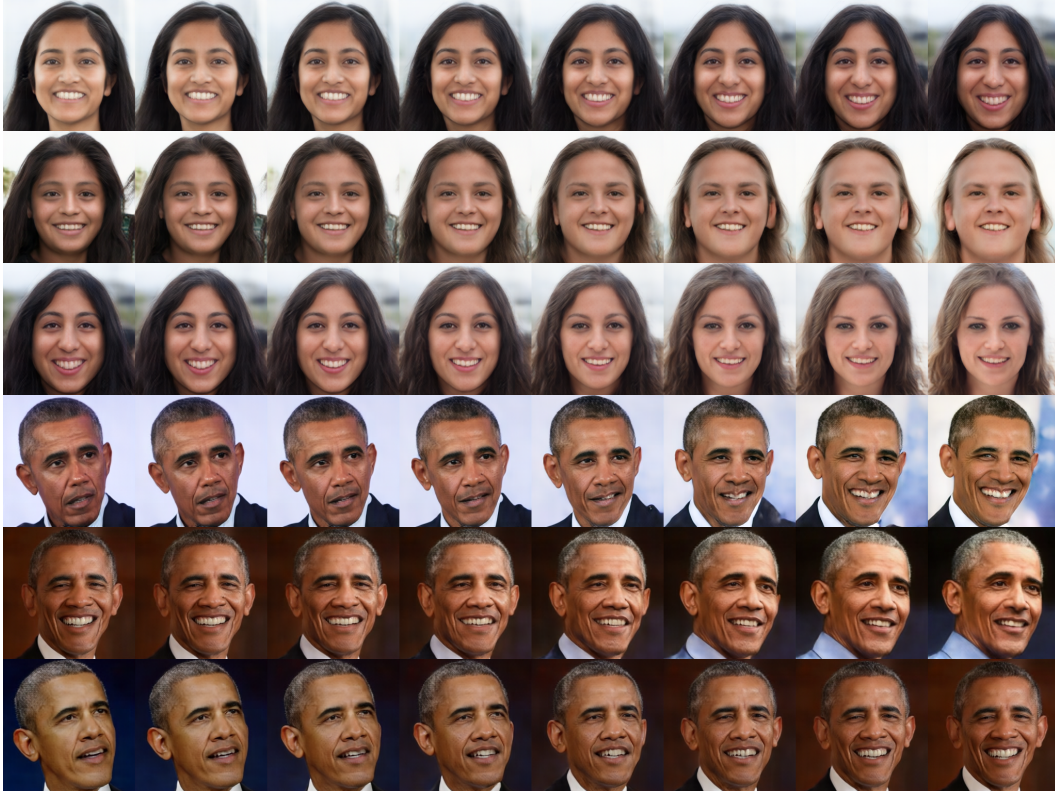

Figure 5: Interpolation results for Adaptive IMLE (Ours). Each row shows a different interpolation.

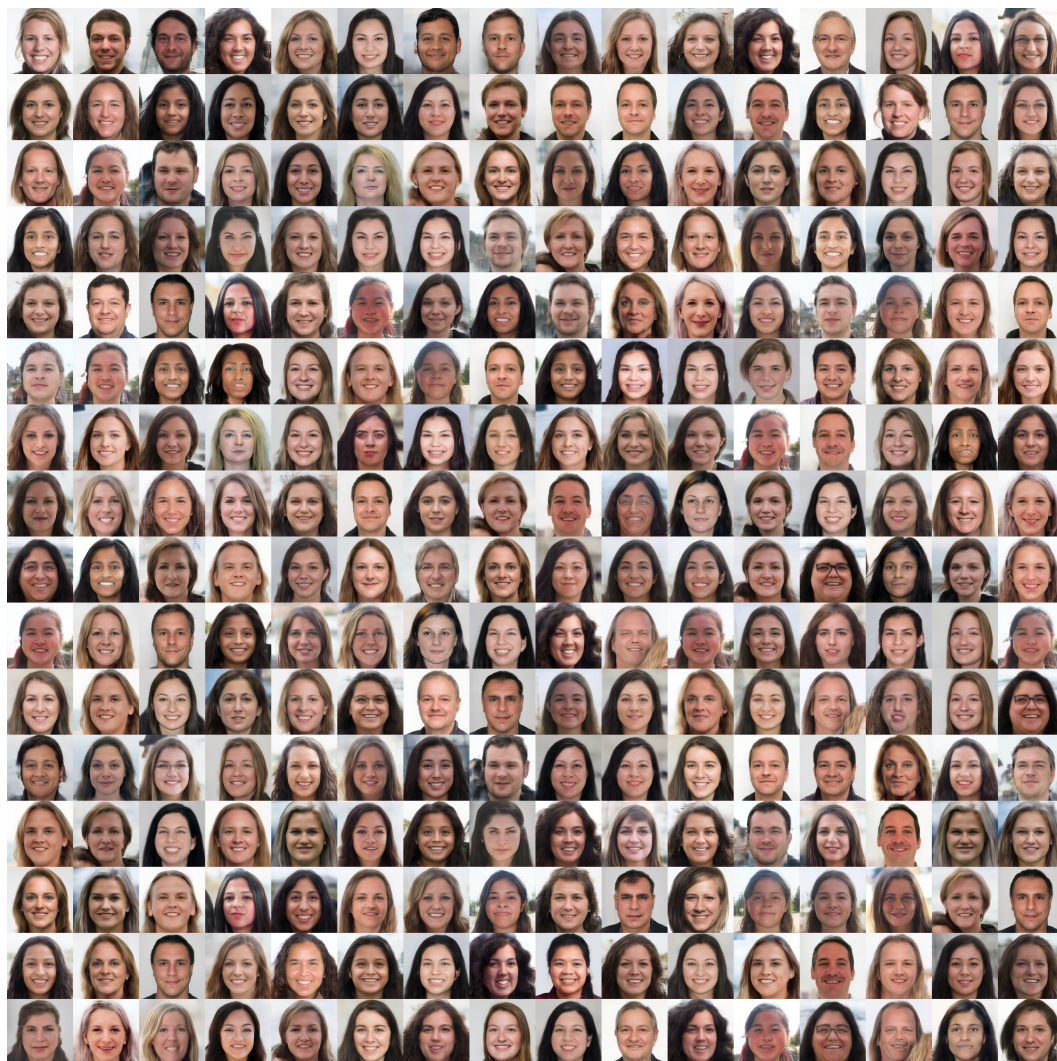

Figure 6: Adaptive IMLE (Ours): *FFHQ subset* randomly generated samples.



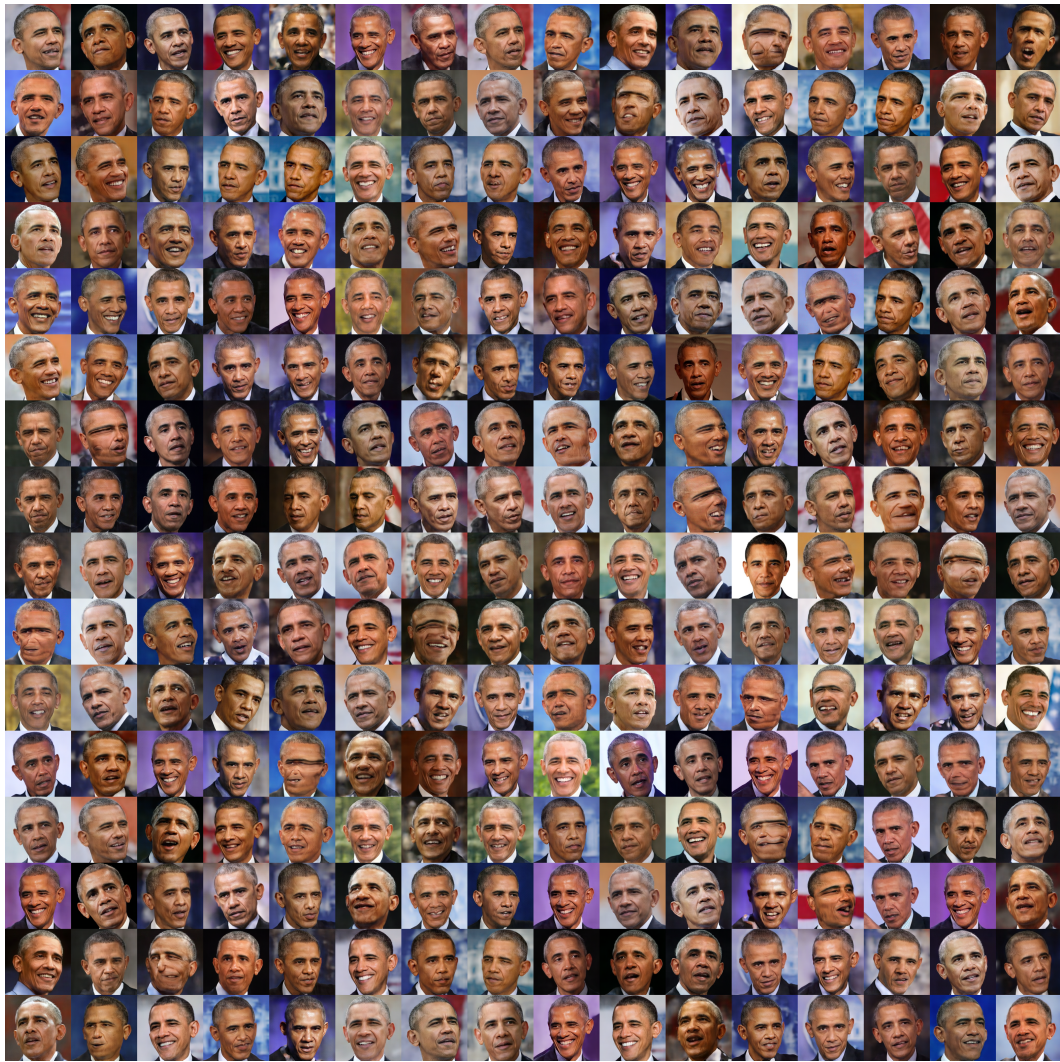

Figure 7: Adaptive IMLE (Ours): *Obama* randomly generated samples.
